# Supplementary material for: Adeno-associated viral vector serotype 9-based gene replacement therapy for SURF1-related Leigh syndrome
Source: PubMed Central journal article supplement — Mol Ther Methods Clin Dev. 2021 Sep 7;23:158–68. doi: 10.1016/j.omtm.2021.09.001 (PMC8517205; doi:10.1016/j.omtm.2021.09.001), 2021-09-07
Supplement: mmc1.pdf [file mmc1.pdf]

**OMTM, Volume 23**

**Supplemental information**

**Adeno-associated viral vector  
serotype 9-based gene replacement  
therapy for *SURF1*-related Leigh syndrome**

**Qinglan Ling, Matthew Rioux, Yuhui Hu, MinJae Lee, and Steven J. Gray**

## Supplementary Information

### Supplementary item #1: Figures

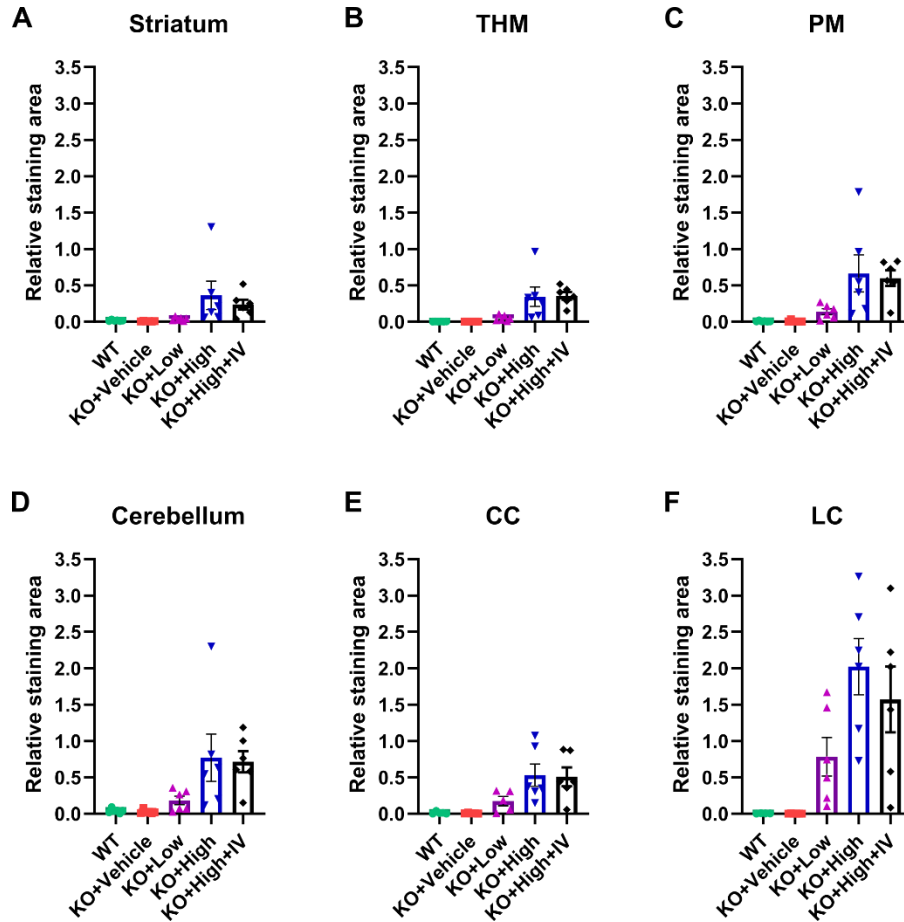

**Figure S1. hSURF1opt mRNA expression in brain regions and spinal cord.** Data represent percent area staining positive for hSURF1opt mRNA. THM: Thalamus, hypothalamus, and midbrain; PM: pons and medulla; CC: cervical cord; LC: lumbar cord. Each data point represents measurement from an individual animal, with bars representing the Mean ± SEM.

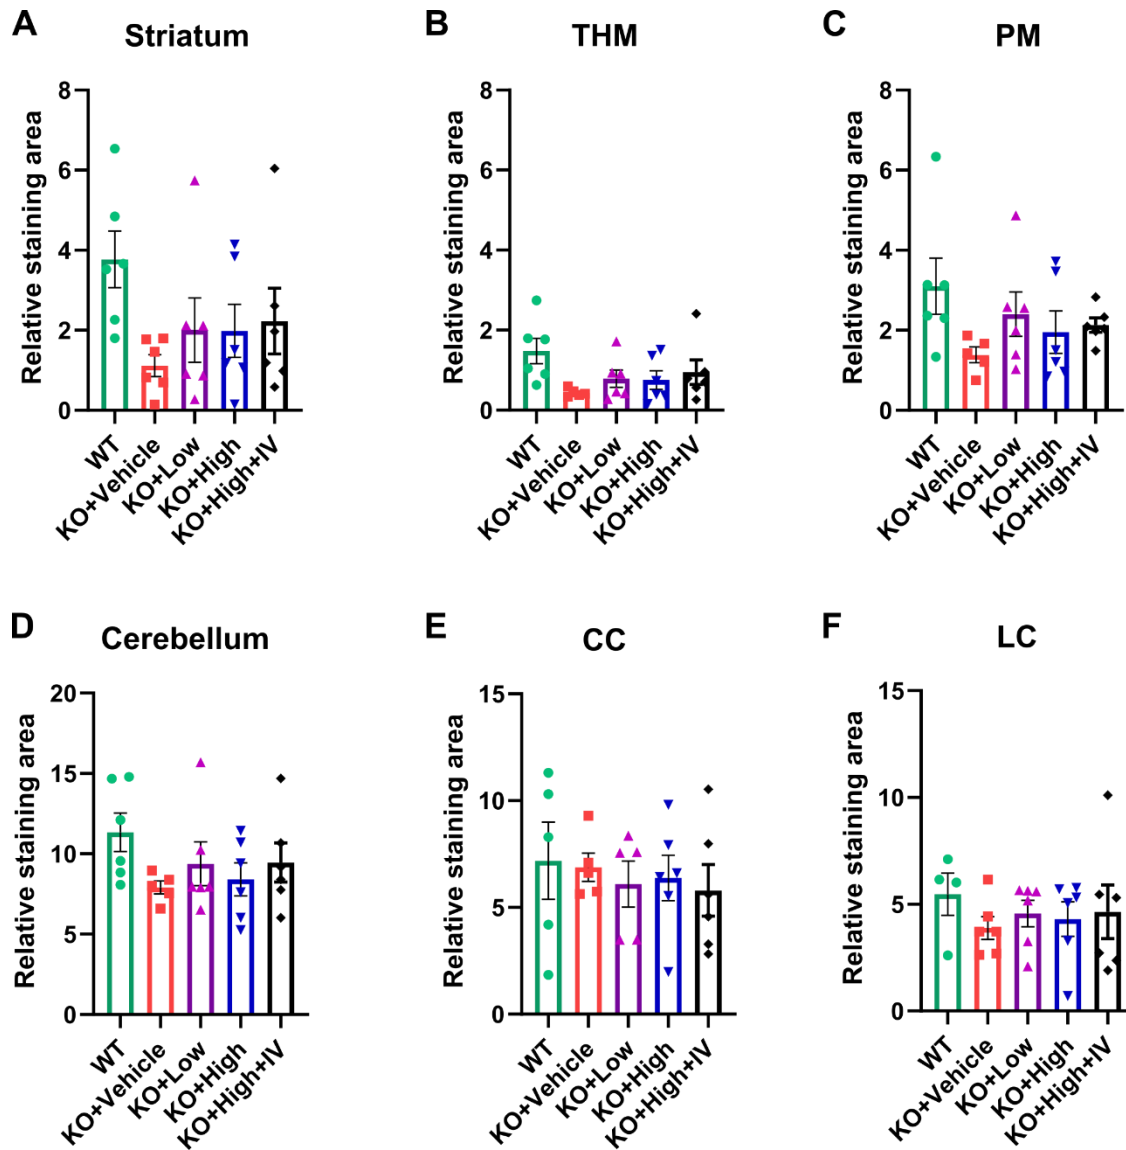

**Figure S2. COX1 protein expression in brain regions and spinal cord.** Data represent percent area staining positive for COX1 protein expression. THM: Thalamus, hypothalamus, and midbrain; PM: pons and medulla; CC: cervical cord; LC: lumbar cord. Each data point represents measurement from an individual animal, with bars representing the Mean ± SEM.

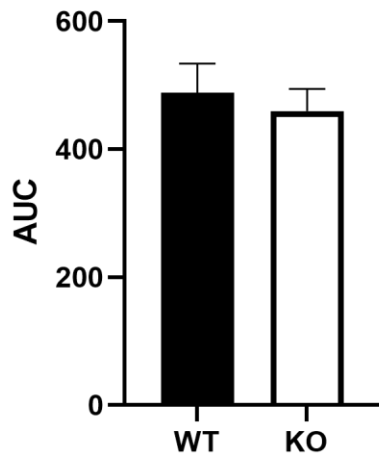

**Figure S3. Rotarod performance of 12-months old mice.** AUC: area under the curve. Bars representing the Mean  $\pm$  SEM.

**Supplementary item #2: Tables**

**Table S1. Individual body weight and statistics**

| Mouse Number | Sex | Genotype | Weight 8/7/19 | Treatment               | Weight on Dose Date | Dose Date | Weight 1 wk. | Weight 2 wk. | Weight 3 wk. | Weight 4 wk. | Weight 2 mo. | Weight 3 mo. | Weight 4 mo. | Weight 5 mo. | Weight 6 Mo. | Weight 7 Mo. | Weight 8 Mo. | Weight 9 Mo. | Weight 10 Mo. | Weight 11 Mo. | Weight 12 Mo. |
|--------------|-----|----------|---------------|-------------------------|---------------------|-----------|--------------|--------------|--------------|--------------|--------------|--------------|--------------|--------------|--------------|--------------|--------------|--------------|---------------|---------------|---------------|
| 1.1          | F   | WT       | 10.5          | Vehicle                 | 13.4                | 8/15/2019 | 15.5         | 16.8         | 16.9         | 17.5         | 20.4         | 21.2         | 25.0         | 27.0         | 25.2         | 26.8         | 26.3         | 32.0         | 30.6          | 33.5          | 32.0          |
| 1.4          | F   | WT       | 9.7           | Vehicle                 | 15.8                | 8/15/2019 | 18.5         | 17.9         | 19.3         | 19.1         | 20.6         | 21.9         | 23.4         | 24.7         | 24.0         | 24.0         | 24.5         | 23.6         | 26.5          | 29.1          | 28.0          |
| 2.2          | F   | WT       | 8.7           | Vehicle                 | 12.5                | 8/13/2019 | 15.0         | 17.0         | 17.3         | 17.2         | 19.5         | 20.0         | 20.5         | 21.7         | 19.7         | 20.1         | 21.1         | 20.4         | 21.5          | 20.9          | 19.0          |
| 2.5          | F   | WT       | 8.5           | Vehicle                 | 12.6                | 8/13/2019 | 16.1         | 17.8         | 18.4         | 19.3         | 24.5         | 24.6         | 24.2         | 25.4         | 24.8         | 24.2         | 25.6         | 26.5         | 27.0          | 27.7          | 28.0          |
| 3.3          | F   | WT       | 9.0           | Vehicle                 | 14.2                | 8/16/2019 | 17.2         | 17.8         | 17.8         | 17.9         | 21.1         | 21.8         | 22.1         | 22.5         | 22.6         | 22.9         | 24.6         | 25.2         | 26.2          | 28.4          | 27.0          |
| <b>Mean</b>  |     |          | <b>9.3</b>    |                         | <b>13.7</b>         |           | <b>16.5</b>  | <b>17.5</b>  | <b>17.9</b>  | <b>18.2</b>  | <b>21.2</b>  | <b>21.9</b>  | <b>23.0</b>  | <b>24.3</b>  | <b>23.3</b>  | <b>23.6</b>  | <b>24.4</b>  | <b>25.5</b>  | <b>26.4</b>   | <b>27.9</b>   | <b>26.8</b>   |
| <b>SD</b>    |     |          | <b>0.8</b>    |                         | <b>1.4</b>          |           | <b>1.4</b>   | <b>0.5</b>   | <b>0.9</b>   | <b>0.9</b>   | <b>1.9</b>   | <b>1.7</b>   | <b>1.8</b>   | <b>2.2</b>   | <b>2.2</b>   | <b>2.4</b>   | <b>2.0</b>   | <b>4.3</b>   | <b>3.2</b>    | <b>4.5</b>    | <b>4.8</b>    |
| 5.1          | M   | WT       | 10.2          | Vehicle                 | 15.9                | 8/15/2019 | 18.4         | 19.3         | 20.2         | 20.3         | 23.3         | 26.4         | 27.5         | 27.6         | 28.7         | 29.4         | 30.4         | 29.9         | 30.8          | 30.5          | 30.0          |
| 5.4          | M   | WT       | 12.2          | Vehicle                 | 18.4                | 8/15/2019 | 20.0         | 21.5         | 23.0         | 24.7         | 27.6         | 29.6         | 31.5         | 32.4         | 34.2         | 34.6         | 35.0         | 35.4         | 36.4          | 36.8          | 34.0          |
| 6.2          | M   | WT       | 9.5           | Vehicle                 | 14.6                | 8/13/2019 | 18.7         | 21.1         | 22.6         | 24.0         | 26.9         | 28.3         | 30.1         | 31.0         | 32.1         | 34.4         | 35.6         | 35.8         | 38.5          | 39.8          | 39.0          |
| 6.5          | M   | WT       | 11.9          | Vehicle                 | 16.3                | 8/13/2019 | 18.8         | 20.5         | 22.8         | 24.4         | 28.0         | 30.1         | 32.2         | 32.3         | 33.7         | 35.0         | 37.0         | 37.7         | 38.8          | 40.4          | 39.0          |
| 7.3          | M   | WT       | 8.8           | Vehicle                 | 16.3                | 8/16/2019 | 20.8         | 22.5         | 23.2         | 23.8         | 27.8         | 30.2         | 31.9         | 33.2         | 34.6         | 36.1         | 38.1         | 40.0         | 39.8          | 41.2          | 41.0          |
| <b>Mean</b>  |     |          | <b>10.5</b>   |                         | <b>16.3</b>         |           | <b>19.3</b>  | <b>21.0</b>  | <b>22.4</b>  | <b>23.4</b>  | <b>26.7</b>  | <b>28.9</b>  | <b>30.6</b>  | <b>31.3</b>  | <b>32.7</b>  | <b>33.9</b>  | <b>35.2</b>  | <b>35.8</b>  | <b>36.9</b>   | <b>37.7</b>   | <b>36.6</b>   |
| <b>SD</b>    |     |          | <b>1.5</b>    |                         | <b>1.4</b>          |           | <b>1.0</b>   | <b>1.2</b>   | <b>1.2</b>   | <b>1.8</b>   | <b>2.0</b>   | <b>1.6</b>   | <b>1.9</b>   | <b>2.2</b>   | <b>2.4</b>   | <b>2.6</b>   | <b>3.0</b>   | <b>3.7</b>   | <b>3.6</b>    | <b>4.4</b>    | <b>4.5</b>    |
| 1.3          | F   | WT       | 10.2          | 2 x 10 <sup>11</sup> vg | 13.4                | 8/15/2019 | 16.9         | 17.0         | 17.4         | 17.5         | 19.0         | 22.1         | 24.3         | 25.1         | 23.6         | 26.0         | 26.4         | 28.8         | 30.0          | 30.5          | 29.0          |
| 2.1          | F   | WT       | 10.1          | 2 x 10 <sup>11</sup> vg | 14.3                | 8/13/2019 | 17.4         | 17.6         | 18.0         | 19.0         | 22.1         | 23.5         | 23.0         | 23.5         | 23.8         | 25.5         | 28.4         | 29.3         | 29.4          | 30.8          | 34.0          |
| 2.4          | F   | WT       | 8.2           | 2 x 10 <sup>11</sup> vg | 11.9                | 8/13/2019 | 14.7         | 15.7         | 16.7         | 16.9         | 18.8         | 19.0         | 21.2         | 22.3         | 21.2         | 21.7         | 23.2         | 23.8         | 26.2          | 26.7          | 27.0          |
| 3.2          | F   | WT       | 9.3           | 2 x 10 <sup>11</sup> vg | 15.3                | 8/16/2019 | 17.8         | 18.5         | 19.2         | 19.5         | 21.1         | 22.1         | 22.7         | 23.6         | 24.7         | 20.0         | 24.3         | 24.4         | 24.6          | 26.4          | 25.0          |
| 3.5          | F   | WT       | 9.6           | 2 x 10 <sup>11</sup> vg | 14.5                | 8/16/2019 | 18.2         | 18.7         | 19.3         | 18.6         | 21.3         | 21.9         | 22.5         | 23.5         | 23.5         | 24.6         | 25.1         | 25.0         | 26.6          | 25.0          | 28.0          |
| <b>Mean</b>  |     |          | <b>9.5</b>    |                         | <b>13.9</b>         |           | <b>17.0</b>  | <b>17.5</b>  | <b>18.1</b>  | <b>18.3</b>  | <b>20.5</b>  | <b>21.7</b>  | <b>22.7</b>  | <b>23.6</b>  | <b>23.4</b>  | <b>23.6</b>  | <b>25.5</b>  | <b>26.3</b>  | <b>27.4</b>   | <b>27.9</b>   | <b>28.6</b>   |
| <b>SD</b>    |     |          | <b>0.8</b>    |                         | <b>1.3</b>          |           | <b>1.4</b>   | <b>1.2</b>   | <b>1.1</b>   | <b>1.1</b>   | <b>1.5</b>   | <b>1.6</b>   | <b>1.1</b>   | <b>1.0</b>   | <b>1.3</b>   | <b>2.6</b>   | <b>2.0</b>   | <b>2.6</b>   | <b>2.3</b>    | <b>2.6</b>    | <b>3.4</b>    |
| 5.3          | M   | WT       | 10.8          | 2 x 10 <sup>11</sup> vg | 15.8                | 8/15/2019 | 18.1         | 18.7         | 20.5         | 21.0         | 23.2         | 25.0         | 27.3         | 27.5         | 29.1         | 30.2         | 30.9         | 31.2         | 33.2          | 34.0          | 32.0          |
| 6.1          | M   | WT       | 11.4          | 2 x 10 <sup>11</sup> vg | 17.0                | 8/13/2019 | 20.0         | 22.1         | 23.8         | 25.1         | 28.2         | 29.8         | 30.8         | 31.8         | 32.2         | 34.0         | 36.0         | 35.6         | 38.0          | 39.8          | 39.0          |
| 6.4          | M   | WT       | 9.5           | 2 x 10 <sup>11</sup> vg | 14.0                | 8/13/2019 | 18.6         | 21.1         | 22.9         | 24.6         | 28.9         | 30.8         | 32.4         | 33.5         | 32.8         | 34.8         | 36.9         | 36.6         | 38.0          | 38.3          | 35.0          |
| 7.2          | M   | WT       | 11.9          | 2 x 10 <sup>11</sup> vg | 17.9                | 8/16/2019 | 19.8         | 22.7         | 23.6         | 25.0         | 26.4         | 28.1         | 28.9         | 30.5         | 30.4         | 32.4         | 33.3         | 34.5         | 35.5          | 37.1          | 36.0          |
| 7.5          | M   | WT       | 11.4          | 2 x 10 <sup>11</sup> vg | 17.2                | 8/16/2019 | 19.4         | 22.1         | 23.1         | 24.1         | 26.9         | 29.2         | 30.0         | 31.1         | 31.2         | 31.5         | 32.9         | 34.5         | 33.7          | 36.0          | 32.0          |
| <b>Mean</b>  |     |          | <b>11.0</b>   |                         | <b>16.4</b>         |           | <b>19.2</b>  | <b>21.3</b>  | <b>22.8</b>  | <b>24.0</b>  | <b>26.7</b>  | <b>28.6</b>  | <b>29.9</b>  | <b>30.9</b>  | <b>31.1</b>  | <b>32.6</b>  | <b>34.0</b>  | <b>34.5</b>  | <b>35.7</b>   | <b>37.0</b>   | <b>34.8</b>   |
| <b>SD</b>    |     |          | <b>0.9</b>    |                         | <b>1.5</b>          |           | <b>0.8</b>   | <b>1.6</b>   | <b>1.3</b>   | <b>1.7</b>   | <b>2.2</b>   | <b>2.2</b>   | <b>1.9</b>   | <b>2.2</b>   | <b>1.5</b>   | <b>1.9</b>   | <b>2.4</b>   | <b>2.0</b>   | <b>2.3</b>    | <b>2.2</b>    | <b>2.9</b>    |
| 1.2          | F   | WT       | 11.7          | 8 x 10 <sup>11</sup> vg | 13.9                | 8/15/2019 | 14.2         | 14.6         | 15.3         | 15.8         | 18.5         | 19.4         | 20.1         | 21.1         | 20.9         | 21.1         | 21.4         | 24.5         | 22.8          | 23.9          | 23            |
| 1.5          | F   | WT       | 9.8           | 8 x 10 <sup>11</sup> vg | 14.0                | 8/15/2019 | 16.0         | 16.4         | 17.5         | 17.1         | 20.9         | 20.4         | 22.4         | 21.1         | 21.6         | 22.2         | 23.2         | 23.3         | 24.7          | 25.1          | 24.0          |
| 2.3          | F   | WT       | 9.0           | 8 x 10 <sup>11</sup> vg | 13.2                | 8/13/2019 | 16.0         | 17.4         | 18.4         | 19.5         | 22.3         | 22.8         | 24.1         | 27.3         | 25.3         | 26.9         | 30.1         | 30.5         | 34.2          | 32.8          | 35.0          |
| 3.1          | F   | WT       | 10.2          | 8 x 10 <sup>11</sup> vg | 14.7                | 8/16/2019 | 16.2         | 17.6         | 17.4         | 18.0         | 20.7         | 21.8         | 22.2         | 23.7         | 24.1         | 24.6         | 25.7         | 26.7         | 29.5          | 34.5          | 35.0          |
| 3.4          | F   | WT       | 9.5           | 8 x 10 <sup>11</sup> vg | 14.9                | 8/16/2019 | 16.9         | 17.3         | 18.3         | 19.3         | 21.6         | 22.2         | 22.8         | 23.7         | 25.2         | 27.0         | 29.1         | 28.5         | 28.8          | 29.8          | 32.0          |
| <b>Mean</b>  |     |          | <b>8.9</b>    |                         | <b>12.7</b>         |           | <b>14.2</b>  | <b>15.2</b>  | <b>15.9</b>  | <b>16.5</b>  | <b>19.0</b>  | <b>19.6</b>  | <b>20.5</b>  | <b>21.4</b>  | <b>21.4</b>  | <b>22.3</b>  | <b>23.7</b>  | <b>24.3</b>  | <b>25.4</b>   | <b>26.5</b>   | <b>26.7</b>   |
| <b>SD</b>    |     |          | <b>1.0</b>    |                         | <b>0.7</b>          |           | <b>1.0</b>   | <b>1.2</b>   | <b>1.2</b>   | <b>1.5</b>   | <b>1.4</b>   | <b>1.4</b>   | <b>1.4</b>   | <b>1.4</b>   | <b>2.5</b>   | <b>2.1</b>   | <b>2.7</b>   | <b>3.7</b>   | <b>2.9</b>    | <b>4.5</b>    | <b>4.6</b>    |
| 5.2          | M   | WT       | 12.0          | 8 x 10 <sup>11</sup> vg | 18.6                | 8/15/2019 | 19.4         | 20.3         | 21.0         | 21.8         | 24.2         | 25.8         | 27.9         | 28.3         | 29.5         | 30.8         | 32.6         | 32.8         | 34.8          | 34.3          | 35.0          |
| 5.5          | M   | WT       | 11.4          | 8 x 10 <sup>11</sup> vg | 16.3                | 8/15/2019 | 16.9         | 17.0         | 18.7         | 20.2         | 22.4         | 24.9         | 26.5         | 26.8         | 28.2         | 28.9         | 30.1         | 30.5         | 31.6          | 33.0          | 29.0          |
| 6.3          | M   | WT       | 11.3          | 8 x 10 <sup>11</sup> vg | 16.2                | 8/13/2019 | 17.4         | 19.3         | 21.2         | 22.5         | 25.5         | 26.0         | 27.6         | 28.7         | 28.5         | 29.9         | 29.2         | 30.7         | 30.9          | 31.8          | 30.0          |
| 7.1          | M   | WT       | 8.7           | 8 x 10 <sup>11</sup> vg | 17.4                | 8/16/2019 | 20.9         | 22.8         | 24.4         | 25.0         | 28.7         | 30.6         | 31.7         | 33.0         | 32.3         | 34.0         | 34.3         | 36.0         | 35.0          | 36.0          | 34.0          |
| 7.4          | M   | WT       | 10.5          | 8 x 10 <sup>11</sup> vg | 20.0                | 8/16/2019 | 22.3         | 24.3         | 26.2         | 27.7         | 31.4         | 32.9         | 34.1         | 34.8         | 35.2         | 36.9         | 37.8         | 39.2         | 40.0          | 41.1          | 39.0          |
| <b>Mean</b>  |     |          | <b>10.8</b>   |                         | <b>17.7</b>         |           | <b>19.4</b>  | <b>20.7</b>  | <b>22.3</b>  | <b>23.4</b>  | <b>26.4</b>  | <b>28.0</b>  | <b>29.6</b>  | <b>30.3</b>  | <b>30.7</b>  | <b>32.1</b>  | <b>32.8</b>  | <b>33.8</b>  | <b>34.5</b>   | <b>35.2</b>   | <b>33.4</b>   |
| <b>SD</b>    |     |          | <b>1.3</b>    |                         | <b>1.6</b>          |           | <b>2.3</b>   | <b>2.9</b>   | <b>3.0</b>   | <b>2.9</b>   | <b>3.6</b>   | <b>3.5</b>   | <b>3.2</b>   | <b>3.4</b>   | <b>3.0</b>   | <b>3.3</b>   | <b>3.4</b>   | <b>3.7</b>   | <b>3.6</b>    | <b>3.6</b>    | <b>4.0</b>    |

**Table S2. Histopathology of mice injected with AAV9/hSURF1opt vectors**

See file "Table S2.xlsx"

- "x" indicates the described abnormalities do not present
- "Mild, Moderate, Mild to moderate, Severe" indicates the degree of damage
- "Absent" indicates the histologist could not find the tissue
- "NA" indicates the tissue was not collected
- Mass on left horn of uterus. This is uncommon stromal change found in older mice
- No abnormalities were found in the lumbar spine however many sections were too caudal and represented the cauda equina instead of lumbar spinal cord.

### Supplementary item #3: AAV9/hSURF1 certification of analysis

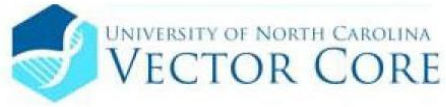

## Quality Control Summary

|       |             |      |                      |
|-------|-------------|------|----------------------|
| Lot # | LAV93-final | Name | SC-CBh-hSURF1opt-BGH |
|-------|-------------|------|----------------------|

### Test by qPCR

| Test # | Titer, vg/mL | Analyst | Date       | File                  |
|--------|--------------|---------|------------|-----------------------|
| 1      | 1.64E+14     | PZ      | 07/18/2019 | 20190718-1243-ghbh-pz |

### PAGE analysis

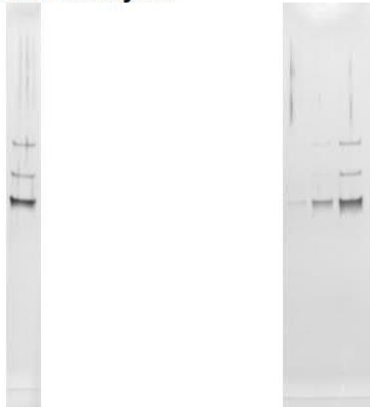

Loaded 5.00E+09 vg 4980E std 2e9vg 5e9vg 1e10vg  
Calculated 5.70E+09 vg

|             |                 |
|-------------|-----------------|
| Analyst     | Ping Zhang      |
| Date        | 07/02/2019      |
| Reference # | 20190702-silver |

SEM

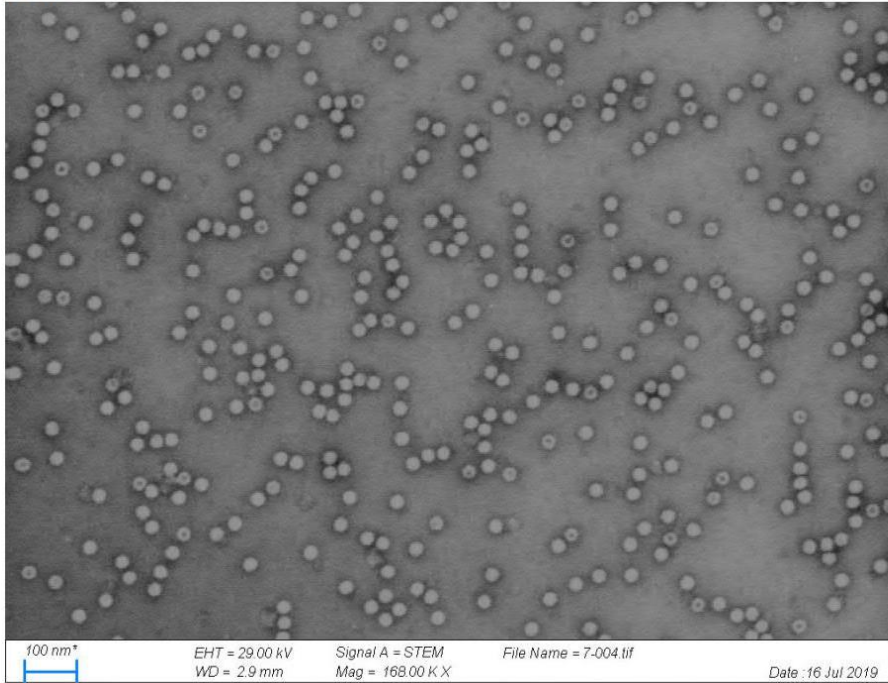

88% full

|             |                |
|-------------|----------------|
| Analyst     | Ping Zhang     |
| Date        | 07/16/2019     |
| Reference # | 20190716-7-004 |
